# Supplementary material for: Fluorescent Carbon Dots from Food Industry By-Products for Cell Imaging
Source: MDPI journal article supplement (doi:10.3390/jfb14020090), 2023-02-07
Supplement: s1 [file s1]

# Supplementary Materials: Fluorescent Carbon Dots from Food Industry By-Products for Cell Imaging

Federica Mancini <sup>1</sup>, Arianna Menichetti <sup>2</sup>, Lorenzo Degli Esposti <sup>1</sup>, Monica Montesi <sup>1</sup>, Silvia Panseri <sup>1</sup>, Giada Bassi <sup>1,3</sup>, Marco Montalti <sup>2</sup>, Laura Lazzarini <sup>4</sup>, Alessio Adamiano <sup>1</sup> and Michele Iafisco <sup>1,\*</sup>

<sup>1</sup> Institute of Science, Technology and Sustainability for Ceramics (ISSMC), National Research Council (CNR), 48018 Faenza, Italy

<sup>2</sup> Department of Chemistry "Giacomo Ciamician", Alma Mater Studiorum-Università di Bologna, 40126 Bologna, Italy

<sup>3</sup> Department of Neuroscience, Imaging and Clinical Sciences, University of Studies "G. D'Annunzio", 66100 Chieti, Italy

<sup>4</sup> Institute of Materials for Electronics and Magnetism (IMEM), National Research Council (CNR), 43124 Parma, Italy

\* Correspondence: michele.iafisco@istec.cnr.it

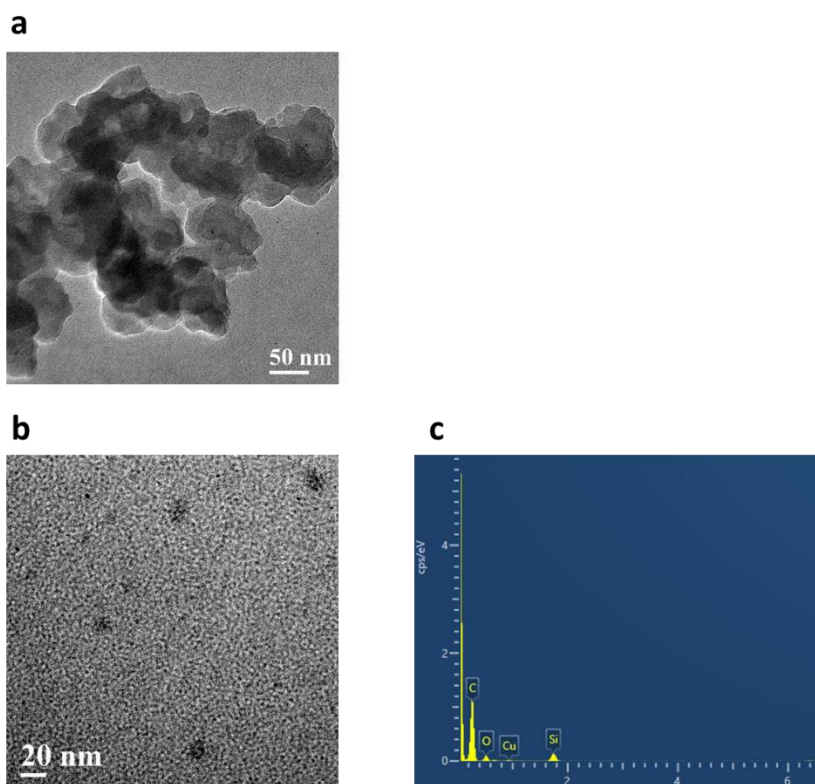

**Figure S1.** TEM micrographs of aggregated (a) and isolated (b) C-dots; EDS map of isolated carbon nanoparticles (c). There are no signals of impurities except for the Cu and Si ones, coming from the TEM chamber.

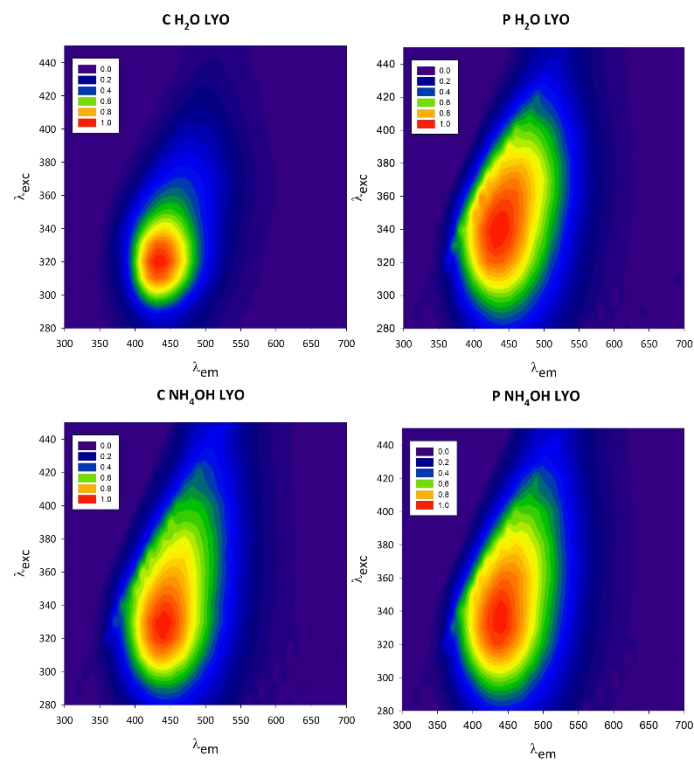

**Figure S2.** 3D excitation-emission maps of lyophilized C-dots.

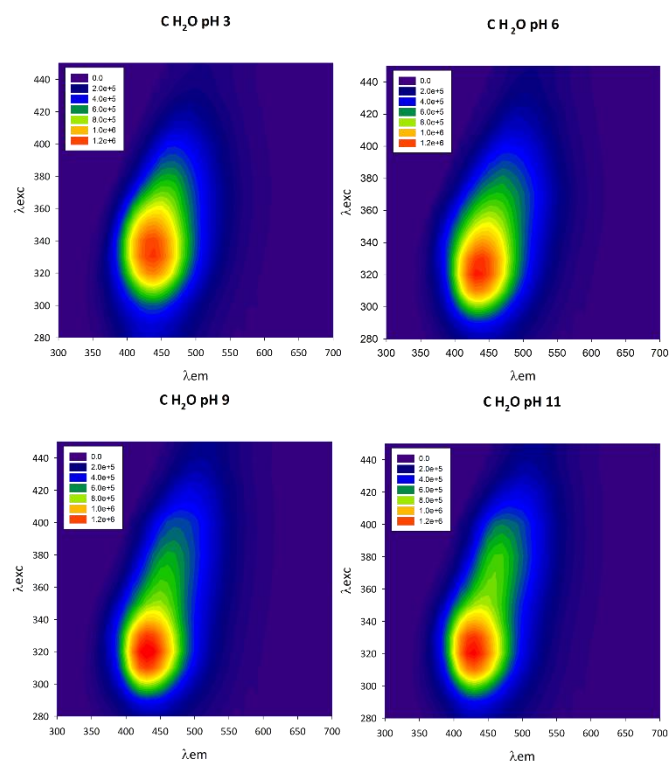

**Figure S3.** pH-dependent 3D excitation-emission maps of C H<sub>2</sub>O.

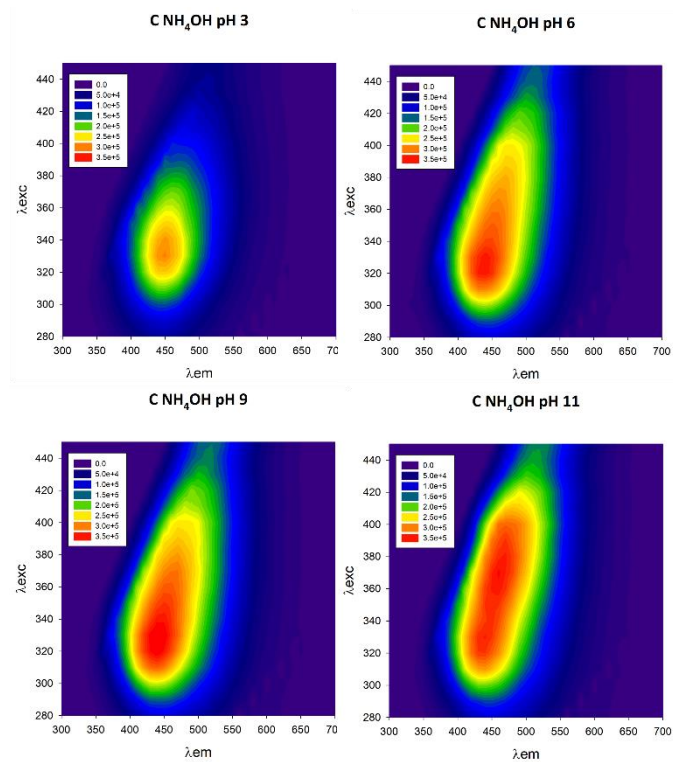

**Figure S4.** pH-dependent 3D excitation-emission maps of C NH<sub>4</sub>OH.

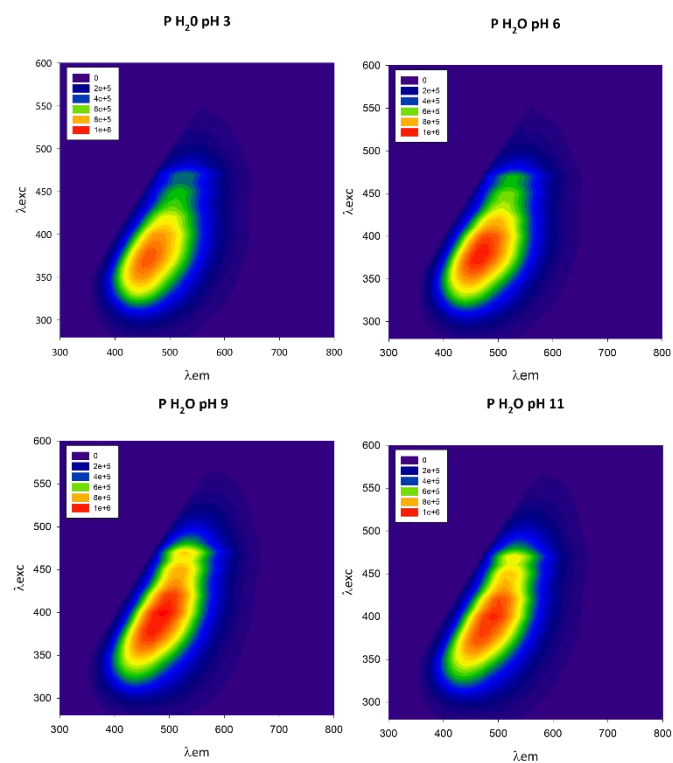

**Figure S5.** pH-dependent 3D excitation-emission maps of P H<sub>2</sub>O.

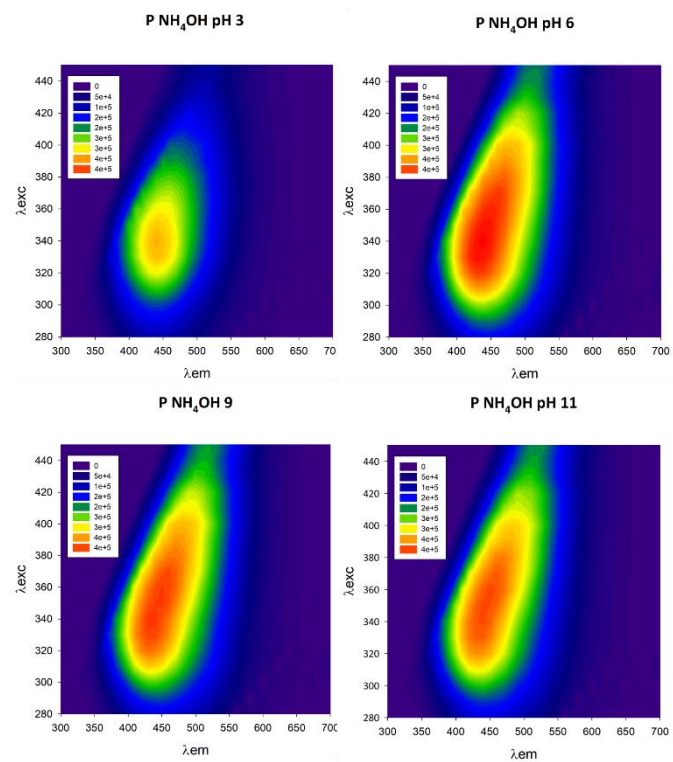

**Figure S6.** pH-dependent 3D excitation-emission maps of P NH<sub>4</sub>OH.
